# Supplementary material for: The Hospital Food Experience Questionnaire Predicts Adult Patient Food Intake
Source: Atypon-hosted journal article supplement (doi:10.3148/cjdpr-2022-024), 2022-11-22

Ward: \_\_\_\_\_ Room: \_\_\_\_\_ Bed: \_\_\_\_\_ Date: \_\_\_\_\_

## Hospital Food Experience Questionnaire (HFEQ)

We would like your opinion on hospital food. First, we would like you to tell us about your food and food-related priorities for hospital meals in general. Then, we would like you to rate the meal you have just received.

### Subscale 1: Food Priorities

We would like you to think about hospital food in general and rate the level of IMPORTANCE to you, as a patient, for each of the following.

**As a patient, how important is it that hospital food ...**

|                | Not<br>important |   | Neutral |   | Very<br>important |
|----------------|------------------|---|---------|---|-------------------|
| ...Looks good  | 1                | 2 | 3       | 4 | 5                 |
| ...Smells good | 1                | 2 | 3       | 4 | 5                 |
| ...Tastes good | 1                | 2 | 3       | 4 | 5                 |
| ...Is fresh    | 1                | 2 | 3       | 4 | 5                 |
| ...Is local    | 1                | 2 | 3       | 4 | 5                 |

**Subscale 1 score = \_\_\_\_/25**

Ward: \_\_\_\_\_ Room: \_\_\_\_\_ Bed: \_\_\_\_\_ Date: \_\_\_\_\_

### Subscale 2: Food-Related Priorities

**As a patient, how important is it that a hospital ...**

|                                                                    | Not<br>important |   | Neutral |   | Very<br>important |
|--------------------------------------------------------------------|------------------|---|---------|---|-------------------|
| ...Offers foods that meet your dietary needs                       | 1                | 2 | 3       | 4 | 5                 |
| ...Offers food that you are used to eating                         | 1                | 2 | 3       | 4 | 5                 |
| ...Offers foods traditional to your culture                        | 1                | 2 | 3       | 4 | 5                 |
| ...Offers food that you like to eat                                | 1                | 2 | 3       | 4 | 5                 |
| ...Offers a variety of food                                        | 1                | 2 | 3       | 4 | 5                 |
| ...Serves food at the right temperature                            | 1                | 2 | 3       | 4 | 5                 |
| ...Allows you to choose your food                                  | 1                | 2 | 3       | 4 | 5                 |
| ...Provides you with enough to eat                                 | 1                | 2 | 3       | 4 | 5                 |
| ...Provides food in packages that are easy to open                 | 1                | 2 | 3       | 4 | 5                 |
| ...Provides food that is easy to chew, swallow, or eat on your own | 1                | 2 | 3       | 4 | 5                 |

**Subscale 2 score = \_\_\_\_/50**

Ward: \_\_\_\_\_ Room: \_\_\_\_\_ Bed: \_\_\_\_\_ Date: \_\_\_\_\_

### Subscale 3: Meal Ratings

Which meal is this?

Breakfast ☐      Lunch ☐      Dinner ☐

Please rate the following characteristics of the food and drinks at this meal:

|                                              | Very Poor | Poor | OK | Good | Very Good |
|----------------------------------------------|-----------|------|----|------|-----------|
| The look of the food/drink                   | 1         | 2    | 3  | 4    | 5         |
| The smell of the food/drink                  | 1         | 2    | 3  | 4    | 5         |
| The taste of the food/drink                  | 1         | 2    | 3  | 4    | 5         |
| The texture of the food/drink                | 1         | 2    | 3  | 4    | 5         |
| The temperature of the food/drink            | 1         | 2    | 3  | 4    | 5         |
| The combination of food on the plate         | 1         | 2    | 3  | 4    | 5         |
| The overall quality of the food at this meal | 1         | 2    | 3  | 4    | 5         |

**Subscale 3 score = \_\_\_\_/35**

**Total HFEQ score = \_\_\_\_/110**

A higher score indicates a higher quality meal experience.

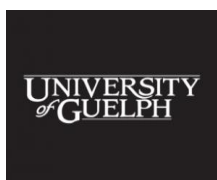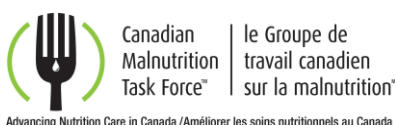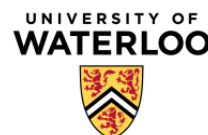

Supplement: cjdpr-2022-024suppla.pdf [file cjdpr-2022-024suppla.pdf]
